# Supplementary material
Source: Springer Nature journal article supplement (https://www.springermedizin.de/resource/supplementary/12985_2010_869_MOESM1_ESM.pdf/9608630)
Supplement: MOESM1 [file 9608630]

## Percent Identity

Divergence

|          | 1        | 2        | 3        | 4        | 5        | 6        | 7        | 8        | 9        |          |                      |
|----------|----------|----------|----------|----------|----------|----------|----------|----------|----------|----------|----------------------|
| <b>1</b> |          | 99.9     | 99.4     | 99.4     | 99.1     | 99.5     | 99.4     | 99.3     | 99.4     | <b>1</b> | MEV-e                |
| <b>2</b> | 0.1      |          | 99.5     | 99.4     | 99.1     | 99.5     | 99.4     | 99.4     | 99.4     | <b>2</b> | Abashiri             |
| <b>3</b> | 0.6      | 0.5      |          | 99.3     | 99.1     | 99.5     | 99.3     | 99.9     | 99.4     | <b>3</b> | Beregovoj-Biocentr   |
| <b>4</b> | 0.6      | 0.6      | 0.7      |          | 99.3     | 99.8     | 99.3     | 99.2     | 99.7     | <b>4</b> | Suning               |
| <b>5</b> | 0.9      | 0.9      | 0.9      | 0.7      |          | 99.4     | 98.9     | 99.0     | 99.3     | <b>5</b> | LYT-2                |
| <b>6</b> | 0.5      | 0.5      | 0.5      | 0.2      | 0.6      |          | 99.5     | 99.4     | 99.9     | <b>6</b> | ZYL-1                |
| <b>7</b> | 0.6      | 0.6      | 0.7      | 0.7      | 1.1      | 0.5      |          | 99.2     | 99.4     | <b>7</b> | Mink-enteritis-virus |
| <b>8</b> | 0.7      | 0.6      | 0.1      | 0.8      | 1.0      | 0.6      | 0.8      |          | 99.3     | <b>8</b> | Rodniki-Biocentr     |
| <b>9</b> | 0.6      | 0.6      | 0.6      | 0.3      | 0.7      | 0.1      | 0.6      | 0.7      |          | <b>9</b> | MEV-DL               |
|          | <b>1</b> | <b>2</b> | <b>3</b> | <b>4</b> | <b>5</b> | <b>6</b> | <b>7</b> | <b>8</b> | <b>9</b> |          |                      |
